# Supplementary material
Source: MDPI journal article supplement (https://www.mdpi.com/2075-163X/13/8/1109)
Supplement: s1 [file s1]

**Table S1.** Selected bond lengths (Å) and angles (°) of Zn(NH<sub>3</sub>)<sub>2</sub>Cl<sub>2</sub> at different temperatures.

| Atom    | Atom             | Length     | Atom            | Atom | Atom             | Angle      |
|---------|------------------|------------|-----------------|------|------------------|------------|
| -173 °C |                  |            |                 |      |                  |            |
| Zn1     | Cl1              | 2.2706(9)  | Cl1             | Zn1  | Cl1 <sup>1</sup> | 108.21(5)  |
| Zn1     | Cl1 <sup>1</sup> | 2.2706(9)  | N1              | Zn1  | Cl1              | 108.86(6)  |
| Zn1     | N1               | 2.014(4)   | N1 <sup>1</sup> | Zn1  | Cl1 <sup>1</sup> | 108.86(6)  |
| Zn1     | N1 <sup>1</sup>  | 2.014(4)   | N1              | Zn1  | Cl1 <sup>1</sup> | 108.86(6)  |
|         |                  |            | N1 <sup>1</sup> | Zn1  | Cl1              | 108.86(6)  |
|         |                  |            | N1              | Zn1  | N1 <sup>1</sup>  | 113.1(2)   |
| -123 °C |                  |            |                 |      |                  |            |
| Zn1     | Cl1              | 2.2706(9)  | Cl1             | Zn1  | Cl1 <sup>1</sup> | 108.43(5)  |
| Zn1     | Cl1 <sup>1</sup> | 2.2707(9)  | N1              | Zn1  | Cl1              | 108.94(6)  |
| Zn1     | N1               | 2.014(4)   | N1 <sup>1</sup> | Zn1  | Cl1 <sup>1</sup> | 108.94(6)  |
| Zn1     | N1 <sup>1</sup>  | 2.014(4)   | N1              | Zn1  | Cl1 <sup>1</sup> | 108.94(6)  |
|         |                  |            | N1 <sup>1</sup> | Zn1  | Cl1              | 108.94(6)  |
|         |                  |            | N1              | Zn1  | N1 <sup>1</sup>  | 112.6(2)   |
| -73 °C  |                  |            |                 |      |                  |            |
| Zn1     | Cl1              | 2.2694(10) | Cl1             | Zn1  | Cl1 <sup>1</sup> | 108.75(5)  |
| Zn1     | Cl1 <sup>1</sup> | 2.2695(10) | N1              | Zn1  | Cl1              | 108.89(6)  |
| Zn1     | N1               | 2.008(4)   | N1 <sup>1</sup> | Zn1  | Cl1 <sup>1</sup> | 108.89(6)  |
| Zn1     | N1 <sup>1</sup>  | 2.008(4)   | N1              | Zn1  | Cl1 <sup>1</sup> | 108.89(6)  |
|         |                  |            | N1 <sup>1</sup> | Zn1  | Cl1              | 108.89(6)  |
|         |                  |            | N1              | Zn1  | N1 <sup>1</sup>  | 112.5(2)   |
| -23 °C  |                  |            |                 |      |                  |            |
| Zn1     | Cl1              | 2.2700(10) | Cl1             | Zn1  | Cl1 <sup>1</sup> | 108.91(6)  |
| Zn1     | Cl1 <sup>1</sup> | 2.2700(10) | N1              | Zn1  | Cl1              | 108.84(7)  |
| Zn1     | N1               | 2.016(4)   | N1 <sup>1</sup> | Zn1  | Cl1 <sup>1</sup> | 108.85(7)  |
| Zn1     | N1 <sup>1</sup>  | 2.016(4)   | N1              | Zn1  | Cl1 <sup>1</sup> | 108.84(7)  |
|         |                  |            | N1 <sup>1</sup> | Zn1  | Cl1              | 108.84(7)  |
|         |                  |            | N1              | Zn1  | N1 <sup>1</sup>  | 112.5(3)   |
| 27 °C   |                  |            |                 |      |                  |            |
| Zn1     | Cl1              | 2.2703(11) | Cl1             | Zn1  | Cl1 <sup>1</sup> | 109.06(6)  |
| Zn1     | Cl1 <sup>1</sup> | 2.2703(11) | N1              | Zn1  | Cl1              | 108.87(8)  |
| Zn1     | N1               | 2.018(5)   | N1 <sup>1</sup> | Zn1  | Cl1 <sup>1</sup> | 108.87(8)  |
| Zn1     | N1 <sup>1</sup>  | 2.018(5)   | N1              | Zn1  | Cl1 <sup>1</sup> | 108.87(7)  |
|         |                  |            | N1 <sup>1</sup> | Zn1  | Cl1              | 108.87(7)  |
|         |                  |            | N1              | Zn1  | N1 <sup>1</sup>  | 112.2(3)   |
| 77 °C   |                  |            |                 |      |                  |            |
| Zn1     | Cl1              | 2.2679(13) | Cl1             | Zn1  | Cl1 <sup>1</sup> | 109.40(8)  |
| Zn1     | Cl1 <sup>1</sup> | 2.2679(13) | N1              | Zn1  | Cl1              | 108.81(10) |
| Zn1     | N1               | 2.016(5)   | N1 <sup>1</sup> | Zn1  | Cl1 <sup>1</sup> | 108.81(10) |
| Zn1     | N1 <sup>1</sup>  | 2.016(5)   | N1              | Zn1  | Cl1 <sup>1</sup> | 108.81(10) |
|         |                  |            | N1 <sup>1</sup> | Zn1  | Cl1              | 108.81(10) |
|         |                  |            | N1              | Zn1  | N1 <sup>1</sup>  | 112.2(4)   |

<sup>1</sup>1-X,1/2-Y,+Z.

**Table S2.** The comparison of the main Raman bands for  $\text{Zn}(\text{NH}_3)_2\text{Cl}_2$  and ammineite,  $\text{CuCl}_2(\text{NH}_3)_2$ .

|                             | $\text{Zn}(\text{NH}_3)_2\text{Cl}_2$<br>(our data) | ammineite $\text{CuCl}_2(\text{NH}_3)_2$ (Košek<br>et al., 2023) |
|-----------------------------|-----------------------------------------------------|------------------------------------------------------------------|
| $\nu(\text{X}^1\text{-Cl})$ | 281 vs                                              | 230 vs                                                           |
| $\nu(\text{X-N})$           | 417 vs                                              | 424 vs                                                           |
| $\rho(\text{NH}_3)$         | 633 m                                               | -                                                                |
| $\rho(\text{NH}_3)$         | 682 m                                               | 677 m                                                            |
| ?                           | -                                                   | 975 m                                                            |
| $\delta_s(\text{NH}_3)$     | 1333 w                                              | 1292 m                                                           |
| $\delta_{as}(\text{NH}_3)$  | 1457 m                                              | -                                                                |
| $\delta_{as}(\text{NH}_3)$  | 1594 m                                              | 1594 w                                                           |
| $\nu(\text{N-H})$           | -                                                   | 3078 s                                                           |
| $\nu(\text{N-H})$           | 3170 m                                              | 3164 m                                                           |
| $\nu(\text{N-H})$           | 3255 vs                                             | 3247 vs                                                          |
| $\nu(\text{N-H})$           | 3332 s                                              | 3323 s                                                           |
| ?                           | -                                                   | 3587 w                                                           |

<sup>1</sup>X = Zn (for  $\text{Zn}(\text{NH}_3)_2\text{Cl}_2$ ) or Cu (for ammineite,  $\text{CuCl}_2(\text{NH}_3)_2$ ).

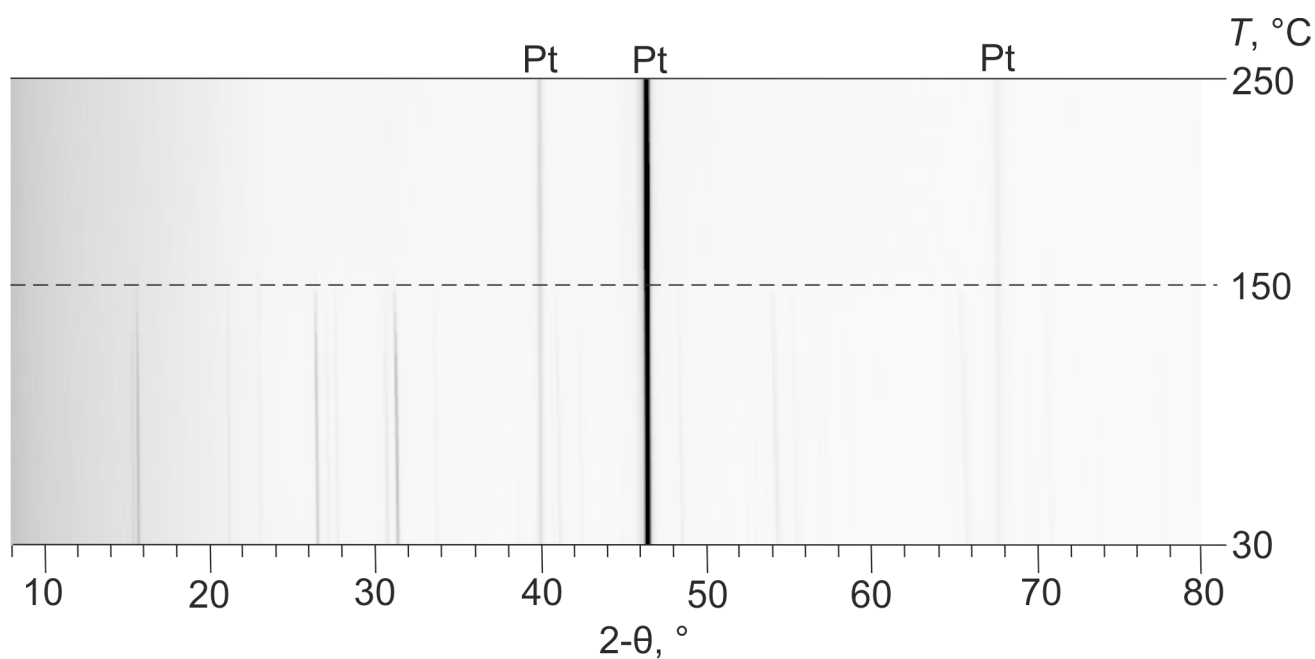

**Figure S1.** Powder X-ray diffraction patterns at different temperatures of  $\text{Zn}(\text{NH}_3)_2\text{Cl}_2$ .
